# Supplementary material for: Biodistribution and inflammatory profiles of novel penton and hexon double-mutant serotype 5 adenoviruses
Source: PubMed Central journal article supplement (PMC3520007; doi:10.1016/j.jconrel.2012.05.025), 2012-12-28
Supplement: mmc1.pdf [file mmc1.pdf]

## Supplementary figures

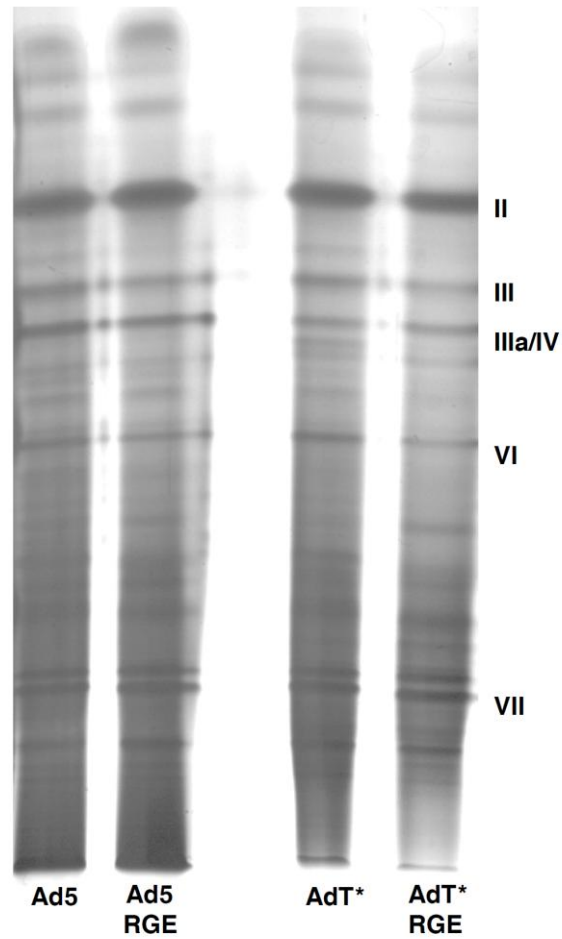

**Fig.S1 Adenoviral capsid composition analysed by silver stain.** SDS-polyacrylamide gels were loaded with  $5 \times 10^{10}$ vp of each adenovirus and stained using the PageSilver silver staining kit according to manufacturer's instructions.

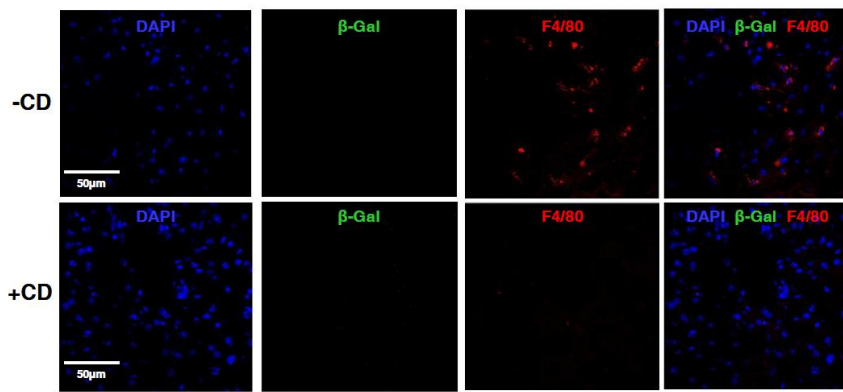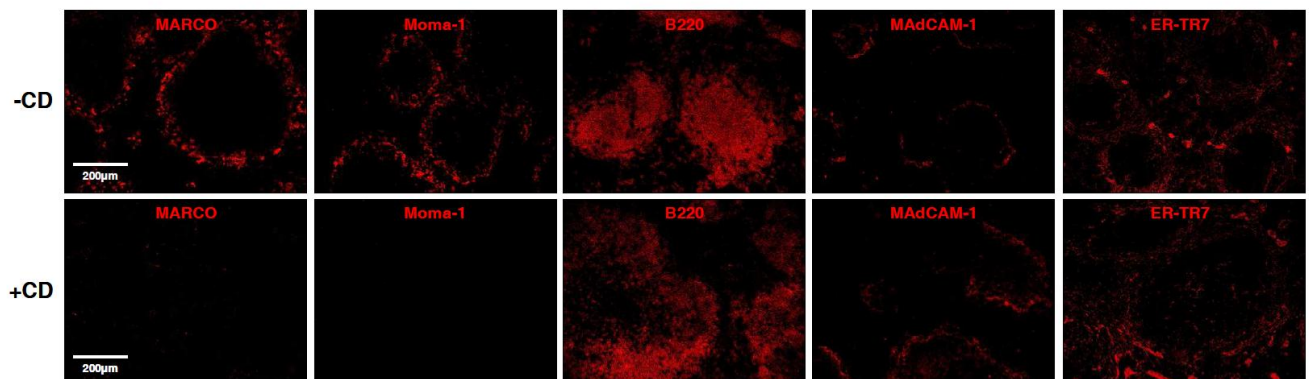

**Fig.S2 Selective depletion of macrophage populations after clodronate liposome pretreatment.** Immunohistochemical analysis of 4µm frozen liver sections or 6µm frozen spleen sections from PBS-administered, non-macrophage-depleted (-CD) or macrophage-depleted (+CD) mice **Upper panel:** Single and merged images of β-galactosidase and F4/80 expression in liver sections from control or macrophage-depleted mice 96 hours after intravascular administration of clodronate liposomes. **Lower panel:** Images of MARCO, Moma-1, B220, MAdCAM-1 and ER-TR7 expression in spleen sections from control (-CD) or macrophage-depleted (+CD) mice 96 hours after intravascular administration of clodronate liposomes.
